# Supplementary material
Source: publisher site journal article supplement (https://www.spandidos-publications.com/7746/downloadSupplementary)

Figure S1. Overall experimental design flowchart.

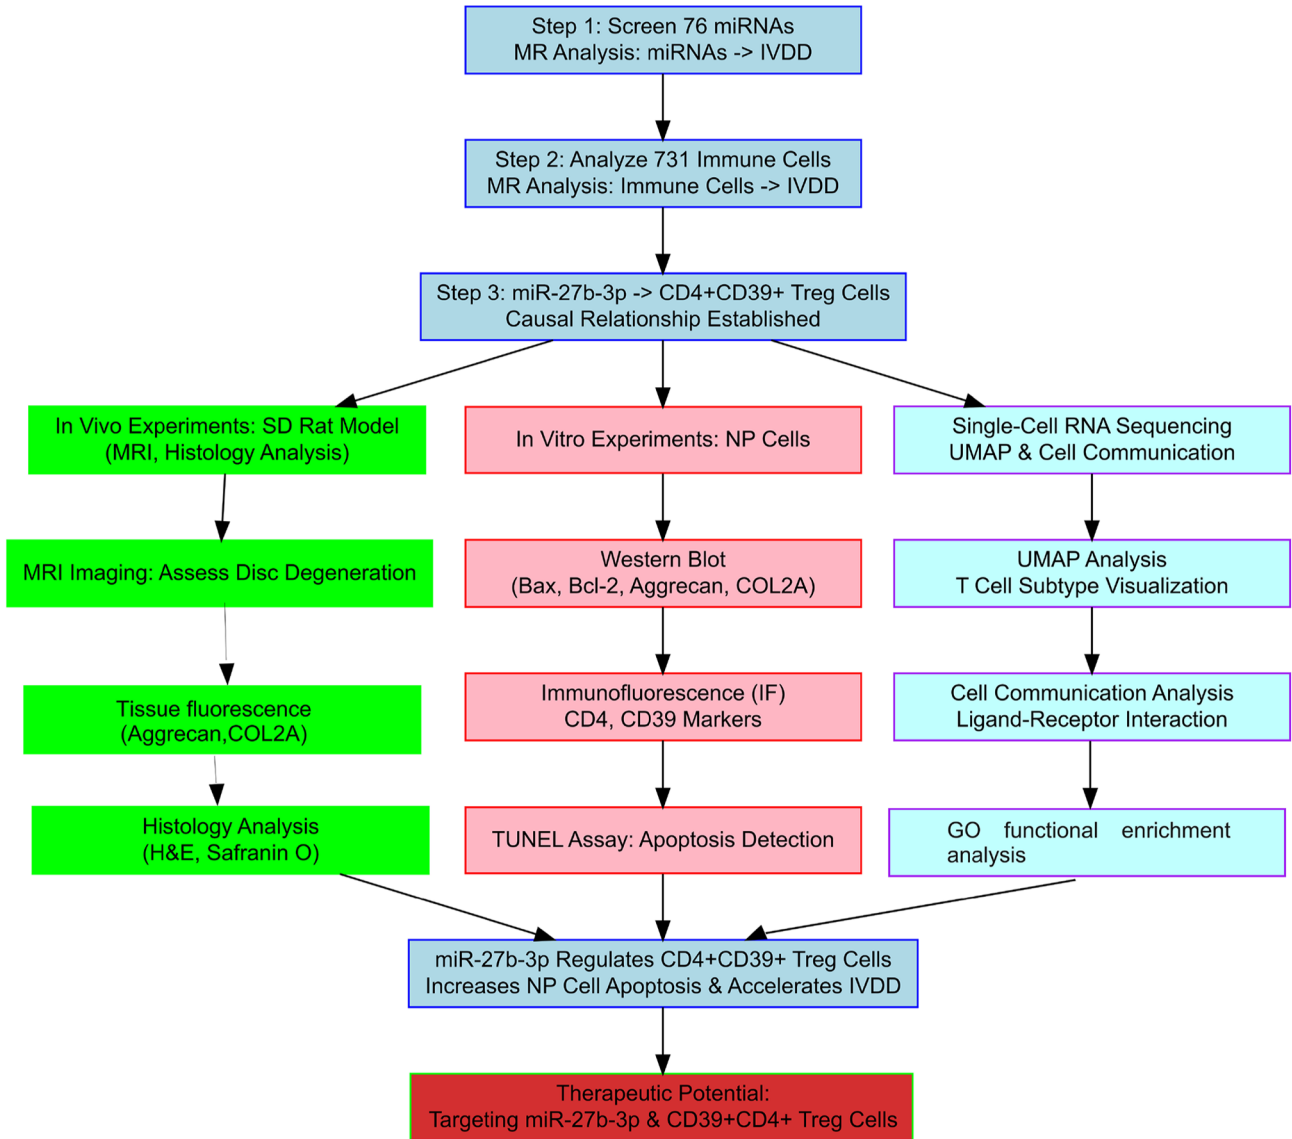

Figure S2. Immunofluorescence staining images of CD4<sup>+</sup>CD39<sup>+</sup> regulatory T cells in nucleus pulposus tissues in the PBS and LPS + miR-27b-3p groups. LPS, lipopolysaccharide; miR, microRNA.

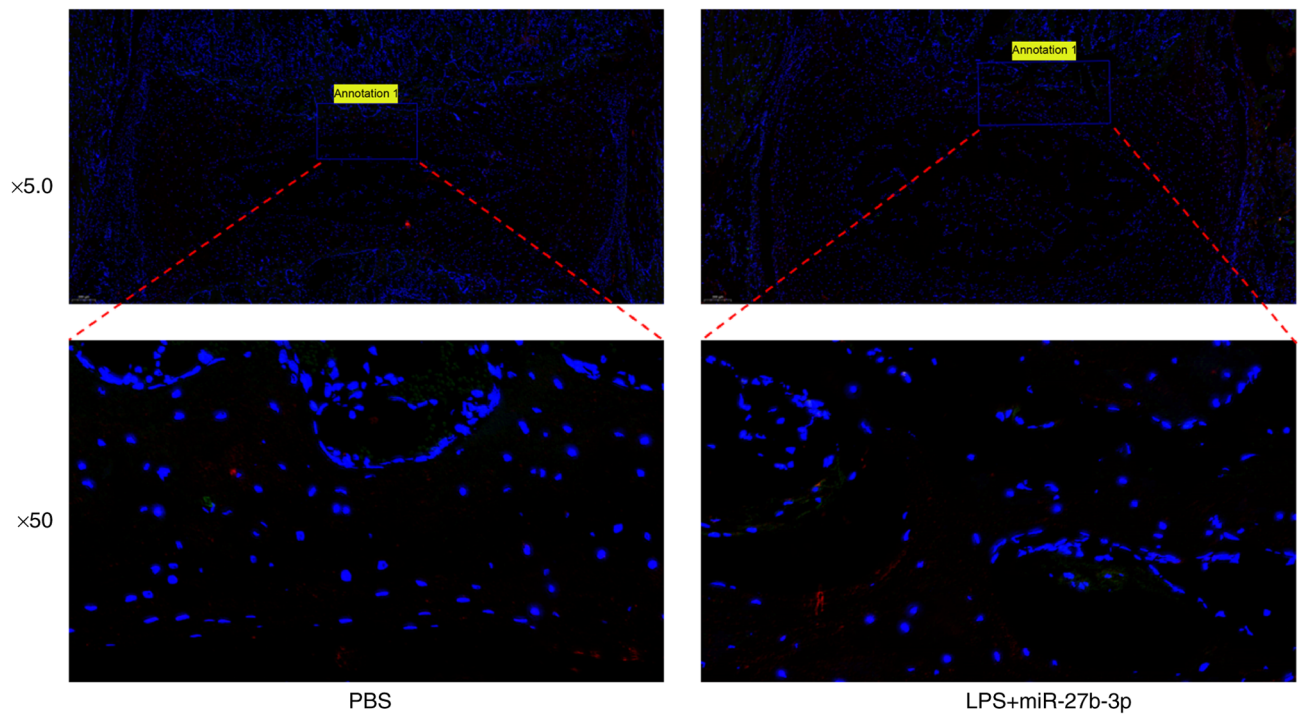

Supplement: Supplementary file 1 [file downloadSupplementary]
